# Supplementary material
Source: PubMed Central journal article supplement (PMC3421185)
Supplement: 1203280109_pnas.201203280SI.pdf [file 1203280109_pnas.201203280SI.pdf]

# Supporting Information

Zhang et al. 10.1073/pnas.1203280109

## SI Materials and Methods

**Cell Culture and E2 Treatments.** MCF-7 cells were maintained in DMEM supplemented with 10% calf serum. The PAD2-depleted MCF-7 cell line was generated by transfection of MCF-7 cells with a Mission shRNA Plasmid DNA containing a short hairpin RNA (shRNA) construct targeting the human PAD2 coding sequence (Sigma; SHCLND-NM\_007365) using FuGENE6 (Roche). The stable PAD4-depleted MCF-7 cell line was described (1). In the control group, cells were transfected with a nontargeting shRNA control vector (Sigma SHC002). Cells were selected by medium containing 1  $\mu\text{g}/\text{mL}$  puromycin (Sigma). Flag-tagged PAD2 overexpression MCF-7 cells were generated by transfection with Flag-PAD2-pcDNA3.1 (+) and selected by medium containing 0.5  $\mu\text{g}/\text{mL}$  puromycin. HeLa-ER cells were kindly provided by W. Lee Kraus (University of Texas Southwestern Medical Center, Dallas, TX). HeLa, HeLa-ER, and MDA-MB231 cells were maintained in DMEM supplemented with 10% (vol/vol) FBS. Before E2 treatment, the cells were cultured for 3 d in DMEM phenol red-free medium supplemented with 10% (vol/vol) charcoal-dextran-treated calf serum. ICI182780 was used at 10  $\mu\text{M}$  for 18 h before the addition of E2.

**Mouse Ovariectomy (OVX), E2 Treatment, and Immunohistochemistry (IHC).** Female nu/nu nude mice (4-wk-old; The Jackson Laboratory) were ovariectomized and simultaneously implanted with s.c. estrogen pellets (0.72 mg per pellet, 60-d release; Innovative Research of America) or a sham control pellet ( $n = 3$  per group). The mice were killed 3 wk after treatment. Uterine tissue was excised, fixed in 10% buffered formalin, embedded in paraffin, sectioned, and stained with anti-H3Cit26 antibody (Abcam; ab19847, lot 135757).

**Confocal Microscopy.** Cells grown on slides were subjected to E2 treatment for 45 min. Confocal microscopy experiments were described (2). Antibody used were as follows: anti-H3Cit26 (Abcam; ab19847, lot 135757), anti-H3Cit2/8/17 (Abcam; ab77164), H4Cit3 (Millipore; 07-596), Ac-H4K5 (Abcam; ab51997), H3K9 dimethyl (Abcam; ab1220), H3K27 trimethyl (Abcam; ab6002), and ER $\alpha$  (Abcam; ab2746). Images were collected with LSM 510 laser scanning confocal microscope (Carl Zeiss).

**Chromatin Immunoprecipitation (ChIP) and ChIP-chip.** ChIP experiments were performed as described (1). Estrogen was used at concentration of 100 nM for 45 min. Antibodies used were anti-H3Cit26 (Abcam; ab19847, lot 135757), anti-ER $\alpha$  (Santa Cruz; sc-542), and anti-Flag (Sigma; F3165). Primers used for the ChIP-qPCR were listed as below. ChIP for H3Cit26 coupled with hybridization to a human HG18 RefSeq promoter microarray from Nimblegen, and genomic data analyses were performed as described (1). The  $\log_2$  ratio (IP/Input) data from each array was subjected to Lowess normalization (3). The normalized data were scaled to equivalent sum of squares and then the between-array mean  $\log_2$  ratio was determined for each probe. An error model was generated by using a 1-kb moving window with 250-bp steps in which both the mean probe  $\log_2$  ratio and  $P$  values were calculated for each window. The  $P$  values were calculated by using the nonparametric Wilcoxon signed-rank test. Significant peaks were defined as the center of three consecutive windows with positive means, the center window with a mean greater than either adjacent window, and all windows having significant  $P$  value less than 0.016. Induced regions were defined as H3Cit26-bound regions (present in the E2-treated samples) that had both

a significant  $P$  value and a fold ratio  $>1.148$  compared with the EtOH samples. Reduced regions were defined as H3Cit26-bound regions (present in the EtOH control samples) that had both a significant  $P$  value and a fold  $<1$  compared with the E2-treated samples. Constitutive regions were defined as H3Cit26-bound regions (present in both conditions) that did not have a significant  $P$  value from the composite fold analysis. The TSS-anchored ChIP-chip heat maps were generated by using 600-bp windows with 150-bp steps and were visualized with Java Treeview (4). The data can be accessed through the NCBI/GEO website by using accession number GSE32599.

**Steady-State Kinetic Assays.** PAD2 was purified by established methods (5, 6). PAD4 was purified as described (7). Histone-based peptides were synthesized by using the Fmoc approach and purified by reverse-phase HPLC to  $\geq 95\%$ . Kinetic assays were performed as described (8). Briefly, reaction buffer (100 mM Tris-HCl at pH 7.6, 2 mM DTT, 10 mM CaCl<sub>2</sub>, and 50 mM NaCl) was preincubated for 10 min at 37 °C with varying concentrations of histone H3 (0–180  $\mu\text{M}$ ), or peptide (22–30) (0–10 mM). The reaction was initiated by the addition of enzyme (0.2  $\mu\text{M}$  final). After 6 min, reactions were quenched by flash freezing in liquid nitrogen, and 200  $\mu\text{L}$  of COLDER solution was added to each tube. The absorbance at 540 nm was quantified and product formation determined by comparing the absorbance to a citrulline standard curve. The data were fit to the following equation:  $v = V_{\text{max}}[S]/(K_m + [S])$  by using the GraFit version 5.0.11 software package (9).

**Acid Extraction of Histones, PAD Assay, and Western Blotting.** MCF-7 cells were first E2 starved, followed by 100 nM E2 treatment for 45 min. EtOH treatment was used as a control. Cellular histones were purified by acid extraction (2). For the PAD assay, human PAD2 proteins were expressed and purified from pET16-PAD2 by using Ni-NTA Protein Purification System (Qiagen). The PAD assay was performed as described (2). Histone samples were separated by 15% SDS/PAGE, and the membrane was detected by Western blot using anti-H3Cit26 (ab19847, lot 135757), and anti-H3 (Abcam; ab1791).

**Identification of Arg26 Citrullination in Human Histone H3 by nanoLC/MS/MS Analysis Using LTQ Orbitrap Velos.** The PAD2-treated H3 bands were excised from gel and subjected to digestion and extraction as reported (10). The digest was reconstituted in 10  $\mu\text{L}$  of 2% acetonitrile (ACN) with 0.5% formic acid (FA) for nanoLC-ESI-MS/MS analysis, which is carried out by using a LTQ-Orbitrap Velos (Thermo-Fisher Scientific) mass spectrometer equipped with “Plug and Play” nano ion source device (CorSolutions). The nanoLC was carried out by Dionex Ultimate3000 MDLC system (Dionex). The tryptic peptides (5–10  $\mu\text{L}$ ) was injected onto a PepMap C18 trap column at 20  $\mu\text{L}/\text{min}$  flow rate and then separated on a PepMap C18 RP nano column, which was installed in the Plug and Play device with a 10- $\mu\text{m}$  spray emitter (New Objective) mounted in front of Orbitrap orifice. The peptides were then eluted in a 90-min gradient of 10–40% ACN in 0.1% FA at 300 nL/min, followed by a 3-min ramping to 95% ACN-0.1% FA and a 5-min holding at 95% ACN-0.1% FA. The column was reequilibrated with 2% ACN-0.1% FA for 20 min before the next run. The Orbitrap Velos was operated in positive ion mode with nanospray voltage set at 1.5 kV and source temperature at 275 °C. Either internal calibration using the background polysiloxane ion signal at  $m/z$  445.120025

as a lock mass or external calibration using Ultramark 1621 for Fourier Transform (FT) mass analyzer was performed. The instrument was performed in parallel data-dependent acquisition (DDA) mode by using FT mass analyzer for one survey MS scan for precursor ions followed by MS/MS scans on the top seven most intensity peaks with multiple charged ions above a threshold ion count of 7,500 in both LTQ mass analyzer and HCD-based FT mass analyzer at 7,500 resolution. MS survey scans at a resolution of 60,000 (FWHM at  $m/z$  400), for the mass range of  $m/z$  375–1800. Dynamic exclusion parameters were set at repeat count 1 with a 20-s repeat duration, exclusion list size of 500, 30-s exclusion duration, and  $\pm 10$  ppm exclusion mass width. Collision induced dissociation (CID) parameters were set at the following values: isolation width 2.0  $m/z$ , normalized collision energy 35%, activation Q at 0.25, and activation time 10 ms. The activation time is 0.1 ms for HCD analysis. All data are acquired under Xcalibur 2.1 operation software (Thermo-Fisher Scientific). All MS and MS/MS raw spectra were processed and searched by using Proteome Discoverer 1.2 (Thermo-Fisher Scientific) against Human RefSeq database downloaded from NCBI database. The database search was performed with three-missed cleavage site by trypsin allowed. The peptide tolerance was set to 10 ppm, and MS/MS tolerance was set to 0.8 Da for CID and 0.05 Da for HCD. A fixed carbamidomethyl modification of cysteine, variable modifications on methionine oxidation, asparagine/glutamine deamidation, lysine acetylation/methylation, and arginine citrullination were set. The peptides with low confident score (with Xcorr score  $< 2$  for doubly charged ion and  $< 2.7$  for triply charged ion) defined by PD1.2 were filtered out, and the remaining peptides were considered for the peptide identification with possible modification determinations. All MS/MS spectra for possibly modified peptides identified from initial database searching were manually inspected and validated by using both PD1.2 and Xcalibur 2.1 software.

**Immunoprecipitation Assay.** MCF-7 cells and MCF-7 cells stably overexpressing Flag-tagged PAD2 were estrogen starved for 3 d followed by 100 nM E2 stimulation for 45 min at 37 °C. The whole-cell lysates were immunoprecipitated with anti-ER or anti-Flag M2 affinity gel (Sigma; A2220). Immunoprecipitates were analyzed by Western blot using anti-PAD2 (ProteinTech; 122100-1-AP), anti-ER $\alpha$ , and anti-Flag antibodies as indicated. The overexpression of Flag-PAD2 was verified by Western blot with anti-Flag and anti- $\beta$ -actin (Sigma; A2066) antibodies.

#### Primers for ChIP-qPCR, RT-qPCR, and MNase Protection-qPCR.

##### ChIP-qPCR:

TFF1 TSS1670-Fwd 5'-CCCACCTTTTCTCCAAATGA-3'  
 TFF1 TSS1670-Rev 5'-GGTGGTTTTGCTGCTCTAA-3'  
 TFF1 TSS1339-Fwd 5'-AGAGGGGCTGCAGAAATGTA-3'  
 TFF1 TSS1339-Rev 5'-GCTGCATGAAGAAATGGACA-3'  
 TFF1 TSS1167-Fwd 5'-GCCACGTCTTAGGGTCTGG-3'  
 TFF1 TSS1167-Rev 5'-TGGGAGCAGAAGTCCTCATC-3'  
 TFF1 TSS959-Fwd 5'-GAGCAGGAGGCTGTCTCTA-3'  
 TFF1 TSS959-Rev 5'-GTGGTTCACTCCCCTGTGTC-3'  
 TFF1 TSS357-Fwd 5'-TTCCGGCCATCTCTACTAT-3'  
 TFF1 TSS357-Rev 5'-ATGGGAGTCTCCTCCAACCT-3'  
 TFF1 TSS273-Fwd 5'-CCTGGATTAAGGTCAGGTTGGA-3'  
 TFF1 TSS273-Rev 5'-TCTTGGCTGAGGGATCTGAGA-3'  
 TFF1 TSS205-Fwd 5'-AGCAAAGTACCTCACCCAC-3'  
 TFF1 TSS205-Rev 5'-TGGTCAAGCTACATGGAAGG-3'  
 TFF1 TSS160-Fwd 5'-TTGTGGTTTTCTGGTGTCA-3'  
 TFF1 TSS160-Rev 5'-ACAGCAGCCCTTATTTGCAC-3'  
 KRT13 TSS 1041-Fwd 5'-GTTACACCAGGGGTGGAG-3'  
 KRT13 TSS 1041-Rev 5'-TTCCAGCATTCATAAAGG-3'  
 KRT13 TSS 662-Fwd 5'-ACAGGGCCACTTCTCTTTC-3'

KRT13 TSS 662-Rev 5'-TTAGGGACCATCAGACACA-GC-3'  
 KRT13 TSS 620-Fwd 5'-TGTCTGATGGTCCCTAAGAT-CC-3'  
 KRT13 TSS 620-Rev 5'-CGAGGCCATCAGAAAAAGTC-3'  
 SCN1A TSS1083-Fwd 5'-CAAATAAAATTCATGGCCAAG-TG-3'  
 SCN1A TSS1083-Rev 5'-GCCAAAATATTCCAGAGCCT-AA-3'  
 SCN1A TSS823-Fwd 5'-TTGAGTTTATGGCACCCCTGAC-3'  
 SCN1A TSS823-Rev 5'-GTGCAGGAGACAGCAGGAG-T-3'

##### RT-qPCR:

TFF1-Fwd 5'-CATCGACGTCCCTCCAGAAGAG-3'  
 TFF1-Rev 5'-CTCTGGGACTAATCACCGTGCTG-3'  
 KRT13-Fwd 5'-GGCAGAGATGAGGGAGCAGTA-3'  
 KRT13-Rev 5'-TCTTGGCGTGGAAACCATT-3'  
 GREB1-Fwd 5'-CAAAGAATAACCTGTTGGCCCTGC-3'  
 GREB1-Rev 5'-GACATGCCTGCGTCTCATACTTA-3'  
 CYP1B1-Fwd 5'-AACGTACCGGCCACTATC-3'  
 CYP1B1-Rev 5'-CACGACCTGATCCAATT-3'  
 WISP2-Fwd 5'-GAGAGGCACACCGAAGAC-3'  
 WISP2-Rev 5'-GGCAGGTACATGGTGTGCG-3'  
 SCN1A-Fwd 5'-CCTACATCGCTGTTGGAC-3'  
 SCN1A-Rev 5'-CCATGGAAACGTGAAAGAA-3'  
 VAT1L-Fwd 5'-CAAGAGTCTTCTCAGCTTTGC-3'  
 VAT1L-Rev 5'-TTGATGGGGTTCACCTTCTC-3'  
 ACTB-Fwd 5'-CCAACCGCGAGAAGATGA-3'  
 ACTB-Rev 5'-CCAGAGGCGTACAGGGATAG-3'  
 GAPDH-Fwd 5'-AGCCACATCGCTCAGACAC-3'  
 GAPDH-Rev 5'-GCCCAATACGACCAATCC-3'

##### MNase protection-qPCR:

TFF1a-Fwd 5'-GCTTAGGCCTAGACGGAATG-3'  
 TFF1a-Rev 5'-TGACCTTGACGGGGGAAG-3'  
 TFF1b-Fwd 5'-TTCATGAGCTCCTCCCTTC-3'  
 TFF1b-Rev 5'-GTGACAACAGTGGCTCAGC-3'  
 TFF1c-Fwd 5'-CCCCTGAGCCACTGTTGT-3'  
 TFF1c-Rev 5'-TAGTGAGAGATGGCCGAAA-3'  
 TFF1d-Fwd 5'-TTCCGGCCATCTCTACTAT-3'  
 TFF1d-Rev 5'-CCCGCCAGGGTAAATACTGT-3'  
 TFF1e-Fwd 5'-CGGGAGGGCCTCTCAGATA-3'  
 TFF1e-Rev 5'-ATGGGAGTCTCCTCCAACCT-3'  
 TFF1f-Fwd 5'-AAGGTCAGGTTGGAGGAGAC-3'  
 TFF1f-Rev 5'-TGAGGGATCTGAGATTAGAAAAG-3'  
 TFF1g-Fwd 5'-TCAGATCCCTCAGCCAAGAT-3'  
 TFF1g-Rev 5'-TGGAAGGATTTGCTGATAGACA-3'  
 TFF1h-Fwd 5'-TCACCACATGTCGTCTCTGTC-3'  
 TFF1h-Rev 5'-TGGTCAAGCTACATGGAAGG-3'  
 TFF1i-Fwd 5'-GCTTAGCATGTCTAGGAAAACA-3'  
 TFF1i-Rev 5'-CGGGGATCCTCTGATAGACA-3'  
 TFF1j-Fwd 5'-CAGTGGAGATTATTGTCTCAGAGG-3'  
 TFF1j-Rev 5'-CGTTAGATAACATTTGCCTAAGGA-3'  
 TFF1k-Fwd 5'-GGCCTCCTTAGGCAAATGTT-3'  
 TFF1k-Rev 5'-AGCCCCGGATTTTATAGGG-3'  
 KRT13a-Fwd 5'-TCAGTCTGATTCTGCCCTTA-3'  
 KRT13a-Rev 5'-CCACAGGAGGAGGGTCCCTA-3'  
 KRT13b-Fwd 5'-CATGTGTAATAGGGGCAAT-3'  
 KRT13b-Rev 5'-AGGCAGGAAGTGGGTGAAGT-3'  
 KRT13c-Fwd 5'-CTTCAACCCAGTTCCTGCCTA-3'  
 KRT13c-Rev 5'-AGTGGCCCTGTCCATTATCA-3'  
 KRT13d-Fwd 5'-ACAGGGCCACTTCTCTTTC-3'  
 KRT13d-Rev 5'-TTAGGGACCATCAGACACAGC-3'  
 KRT13e-Fwd 5'-TGTCTGATGGTCCCTAAGATCC-3'  
 KRT13e-Rev 5'-CGAGGGCCATCAGAAAAAGTC-3'  
 KRT13f-Fwd 5'-GGCCTCGGAGCTATTTCTTT-3'  
 KRT13f-Rev 5'-CGATAGAATCACCTGCCTTGA-3'  
 KRT13g-Fwd 5'-TCAAGGCAGGTGATTCTATCG-3'  
 KRT13g-Rev 5'-GGGATGTCTGGATCCTTCT-3'

KRT13h-Fwd 5'-GGCCCCTGGAGTAGATGAAG-3'  
 KRT13h-Rev 5'-CTGACTGGGATGTCCTGGAT-3'  
 KRT13i-Fwd 5'-ATCCAGGACATCCCAGTCAG-3'  
 KRT13i-Rev 5'-CAGAGTGGCTCTGTGCTTTG-3'  
 KRT13j-Fwd 5'-ACTCTGCACCCACCTTTT-3'  
 KRT13j-Rev 5'-AGAACGGGACCTGAGATGC-3'  
 WISP2a-Fwd 5'-GGCACCTCCATCAGAAAGTG-3'  
 WISP2a-Rev 5'-TTCAGGAATACCAGGCAAGG-3'  
 WISP2b-Fwd 5'-GGTATTCTGAACCTCCACCTG-3'  
 WISP2b-Rev 5'-GAGGCACAACACTGACCTGA-3'  
 WISP2c-Fwd 5'-TCCTCAGGTCAGTGTGTGTC-3'  
 WISP2c-Rev 5'-GATGGGGTCAAGCCAAATC-3'  
 WISP2d-Fwd 5'-CAAATGGATTTGGCTTGACC-3'  
 WISP2d-Rev 5'-GGCAGGCTGGACCTACTATG-3'  
 WISP2e-Fwd 5'-CAAGCGCTGGCACATAGT-3'  
 WISP2e-Rev 5'-ATAAGGGGCTCCCTTGG-3'  
 WISP2f-Fwd 5'-CCCTTATTGCCAAGAGCAAAC-3'  
 WISP2f-Rev 5'-TGACCCAGCAAAAATCC-3'  
 WISP2g-Fwd 5'-GGAAGTTTTGCTCTGGGTCA-3'  
 WISP2g-Rev 5'-GGTTTTCTGGCAGGCAGATT-3'  
 WISP2h-Fwd 5'-AATCTGCCTGCCAGAAACC-3'  
 WISP2h-Rev 5'-GTGGCCCTGACTCTGGGTAG-3'  
 WISP2i-Fwd 5'-CCACGGAGCTTAGGAGACCT-3'  
 WISP2i-Rev 5'-CAGTAAACAACCCCTTTGCAG-3'  
 WISP2j-Fwd 5'-AGCTCTGCAAAAGGGTTGTT-3'  
 WISP2j-Rev 5'-CCTATTCCAGACCCCTGTGTC-3'  
 WISP2k-Fwd 5'-GACAGGGGGTCTGGAATAGG-3'  
 WISP2k-Rev 5'-AGGGTCCTAGCCCTGCTGTA-3'  
 GREB1a-Fwd 5'-GGAACAGATGGGAAAGACAA-3'  
 GREB1a-Rev 5'-CTCGCTCCAAGACCAGA-3'  
 GREB1b-Fwd 5'-CCTAGGAGCTCTGGTCTTG-3'  
 GREB1b-Rev 5'-TGGCCAAATTGAACATAGG-3'  
 GREB1c-Fwd 5'-TGTTCAATTGTGGCCAATAAA-3'  
 GREB1c-Rev 5'-CAAGCCCTGATCAAGGAAAC-3'  
 GREB1d-Fwd 5'-GTTTTCTTGATCAGGGCTTG-3'  
 GREB1d-Rev 5'-TTTTGCTCAAAGTGAGGACGTT-3'  
 GREB1e-Fwd 5'-TCCTCACTTTGAGCAAAAGC-3'  
 GREB1e-Rev 5'-AACAAAACTAAAGGCGTAAGGA-3'  
 GREB1f-Fwd 5'-CGCCTTTAGTTTTTTGTTAAAGGT-3'  
 GREB1f-Rev 5'-ATGACCCAGTTGCCACACTT-3'  
 GREB1g-Fwd 5'-AGTGTGGCAACTGGGTCATT-3'  
 GREB1g-Rev 5'-GCTGCGGCAATCAGAAGTAT-3'  
 GREB1h-Fwd 5'-CCGACGACAGCAATGATG-3'  
 GREB1h-Rev 5'-TGAAAAGGCGAGCAAACTTGT-3'  
 GREB1i-Fwd 5'-CTTTTCATTCTGTGGGTCGT-3'  
 GREB1i-Rev 5'-ACAGACCCAAACATGCTGCT-3'  
 GREB1j-Fwd 5'-AGCAGCATGTTTGGGTCTGT-3'  
 GREB1j-Rev 5'-CTAGTGGGGACAAGCACACA-3'  
 GREB1k-Fwd 5'-GTGTGTGCTTGTCCCCACTA-3'  
 GREB1k-Rev 5'-TGGAAAGCCATATCCCTAA-3'  
 CYP1B1a-Fwd 5'-GCCGCAAGAACTGGAAAA-3'  
 CYP1B1a-Rev 5'-ACCTCAGTGGAGGCTCTTTG-3'  
 CYP1B1b-Fwd 5'-CTCCACTGAGGTGGCAATTT-3'  
 CYP1B1b-Rev 5'-GCCCTGGTTGGTTGTTTA-3'  
 CYP1B1c-Fwd 5'-GCTGCCACTACACTGGCTTT-3'  
 CYP1B1c-Rev 5'-ACGACCTCCCTTCCCTCTC-3'

CYP1B1d-Fwd 5'-GGAGAGGGAAGGGAGGTC-3'  
 CYP1B1d-Rev 5'-CCACGCTCGGTACAACCT-3'  
 CYP1B1e-Fwd 5'-GTTGTACCGAGCGTGGTTCT-3'  
 CYP1B1e-Rev 5'-ACGTTTTCCATTGTGCGGTA-3'  
 CYP1B1f-Fwd 5'-GTTACCGCACAATGGAAACG-3'  
 CYP1B1f-Rev 5'-GCTCTACCAGCAGGCTTTCA-3'  
 CYP1B1g-Fwd 5'-ACCTCCGCTCCCATGAAA-3'  
 CYP1B1g-Rev 5'-ACACCAGGCGCTTTGAC-3'  
 CYP1B1h-Fwd 5'-GTCAAAGCGGCCTGGTGT-3'  
 CYP1B1h-Rev 5'-TCCTCCGGGTTTTAAGGACT-3'  
 CYP1B1i-Fwd 5'-CCTCCTTCTACCCAGTCTCTAAA-3'  
 CYP1B1i-Rev 5'-TCCCCTCCCCTCCAGA-3'  
 CYP1B1j-Fwd 5'-TGACTCTGGAGTGGGAGTGG-3'  
 CYP1B1j-Rev 5'-CTCACAACCTGGAGTCGCAGA-3'  
 SCN1Aa-Fwd 5'-CAAATAAAATTCATGGCCAAGTG-3'  
 SCN1Aa-Rev 5'-GCCAAAATATTCCAGAGCCTAA-3'  
 SCN1Ab-Fwd 5'-TCTGGAATATTTTGGCTCAGTAAT-3'  
 SCN1Ab-Rev 5'-GACGCCAAATCCCAATGTA-3'  
 SCN1Ac-Fwd 5'-ACATTTGGGATTTGGCGTCT-3'  
 SCN1Ac-Rev 5'-AAAACCGTCAACCCCATACA-3'  
 SCN1Ad-Fwd 5'-TGTATGGGGTTGACGGTTTTT-3'  
 SCN1Ad-Rev 5'-TGAAATTCTTGCTGATTCTATAGTCC-3'  
 SCN1Ae-Fwd 5'-CAAGAATTTTATTATTGCTTCAGTG-3'  
 SCN1Ae-Rev 5'-TCAGGGTGCCATAAACTCAA-3'  
 SCN1Af-Fwd 5'-TTGAGTTTATGGCACCCCTGAC-3'  
 SCN1Af-Rev 5'-GTGCAGGAGACAGCAGGAGT-3'  
 SCN1Ag-Fwd 5'-GAGACTCCTGCTGTCTCTCTG-3'  
 SCN1Ag-Rev 5'-GGTGGGGGTGGAAGAAGATA-3'  
 SCN1Ah-Fwd 5'-ATCTTCTTCCACCCCCACCT-3'  
 SCN1Ah-Rev 5'-GAAGGAGAGGAAAACCTAGGCTGT-3'  
 SCN1Ai-Fwd 5'-CAGCCTAGTTTTCTCTCTCCTC-3'  
 SCN1Ai-Rev 5'-AGTCCACGGTTGGCACAATG-3'  
 SCN1Aj-Fwd 5'-GTCCAACCGTGGACTGTCTT-3'  
 SCN1Aj-Rev 5'-TGTCCTGCTCACTTCACTAGC-3'  
 VAT1La-Fwd 5'-GGGCATTTAAAGCAGTGAGG-3'  
 VAT1La-Rev 5'-AAGTGCTGCCTTCTCTCC-3'  
 VAT1Lb-Fwd 5'-GGGAGAGAAGAGGCAGCACT-3'  
 VAT1Lb-Rev 5'-TCAGAGCATGAGGCATGAAG-3'  
 VAT1Lc-Fwd 5'-ACTGTGTCCTTCATGCCTCA-3'  
 VAT1Lc-Rev 5'-TGGGGTGGACATGATTTTCAG-3'  
 VAT1Ld-Fwd 5'-TGTCCTCACTGAAATCATGTCCA-3'  
 VAT1Ld-Rev 5'-TTTTTCTATATTGTGTGAAGTGCTG-3'  
 VAT1Le-Fwd 5'-ACCCAGCACTTACACAAT-3'  
 VAT1Le-Rev 5'-CCTGAGCCTCAACACACTCA-3'  
 VAT1Lf-Fwd 5'-TGTTGAGGCTCAGGAAGGTT-3'  
 VAT1Lf-Rev 5'-TGCAGGTGAGGAAGTAGGTCT-3'  
 VAT1Lg-Fwd 5'-CCTCACTGCATCTCTTTCC-3'  
 VAT1Lg-Rev 5'-GGAAGGACGTGGTTTTTCCCTA-3'  
 VAT1Lh-Fwd 5'-ACTGCCCCTAGGAAAACCAC-3'  
 VAT1Lh-Rev 5'-GGCTCTTTGAGAAAAACAGCTC-3'  
 VAT1Li-Fwd 5'-CTGTTTTTCTCAAAGAGCCTGA-3'  
 VAT1Li-Rev 5'-TGCATGCACATACACAGAGTAG-3'  
 VAT1Lj-Fwd 5'-TGTATGTGCATGCATGTTGG-3'  
 VAT1Lj-Rev 5'-GTGTTCTGATCCCCGGAAG-3'  
 VAT1Lk-Fwd 5'-GAGCGGGTACACACTGGTCT-3'  
 VAT1Lk-Rev 5'-CACCATTTGCGGCTATTAAAGA-3'

- Zhang X, et al. (2011) Genome-wide analysis reveals PADI4 cooperates with Elk-1 to activate c-Fos expression in breast cancer cells. *PLoS Genet* 7:e1002112.
- Wang Y, et al. (2004) Human PAD4 regulates histone arginine methylation levels via demethyliminase. *Science* 306:279–283.
- Smyth GK, Speed T (2003) Normalization of cDNA microarray data. *Methods* 31: 265–273.
- Saldanha AJ (2004) Java Treeview—extensible visualization of microarray data. *Bioinformatics* 20:3246–3248.
- Knuckley B, et al. (2010) Substrate specificity and kinetic studies of PADs 1, 3, and 4 identify potent and selective inhibitors of protein arginine deiminase 3. *Biochemistry* 49:4852–4863.

- Rajmakers R, et al. (2007) Methylation of arginine residues interferes with citrullination by peptidylarginine deiminases in vitro. *J Mol Biol* 367:1118–1129.
- Knuckley B, Bhatia M, Thompson PR (2007) Protein arginine deiminase 4: Evidence for a reverse protonation mechanism. *Biochemistry* 46:6578–6587.
- Kearney PL, et al. (2005) Kinetic characterization of protein arginine deiminase 4: a transcriptional corepressor implicated in the onset and progression of rheumatoid arthritis. *Biochemistry* 44:10570–10582.
- Leatherbarrow RJ (2004) *Grafit Ver 5.0* (Erathicus Software, Staines, UK).
- Zhang S, Van Pelt CK, Henion JD (2003) Automated chip-based nano-electrospray-mass spectrometry for rapid identification of proteins separated by two-dimensional gel electrophoresis. *Electrophoresis* 24:3620–3632.





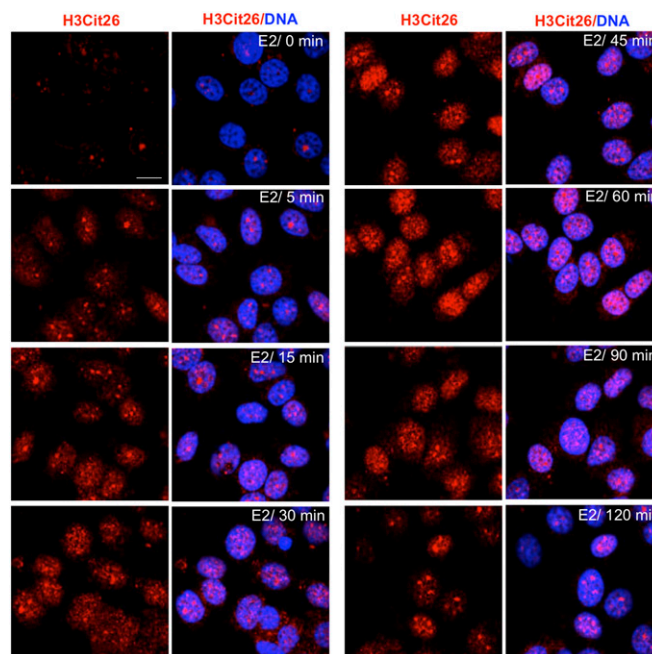

**Fig. S3.** Time course of E2-induced global H3R26 citrullination in MCF-7 cells. Confocal immunofluorescence microscopic images showing that treatment of estrogen-starved MCF-7 cells with 100 nM of E2 results in H3R26 citrullination within 5 min and that the signal peaked at 45 min after E2 treatment. (Scale bar: 10  $\mu$ m.)

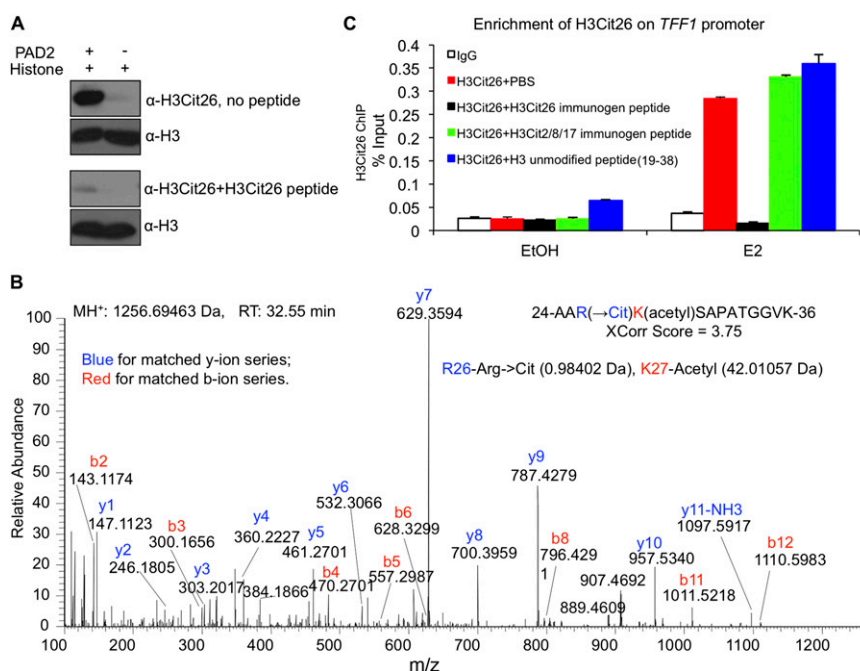

**Fig. S4.** H3Cit26 antibody specificity. (A) Specificity of the anti-H3Cit26 antibody was tested with peptide competition assay. Western blot showing that the anti-H3Cit26 antibody is specifically reactive with the appropriately sized band from human PAD2-treated MCF-7 cell histones but not from nontreated histones. Anti-H3Cit26 antibody was preincubated with 1  $\mu$ g/mL H3Cit26 immunogen peptide (Abcam; ab20631) overnight at 4  $^{\circ}$ C before Western blot analysis. The competing peptide nearly completely blocked detection of H3Cit26. Anti-histone H3 staining revealed the presence of approximately equal amounts of histone in each lane. (B) The positive band in A was subjected to MS/MS analysis. Citrullination at R26 of the tryptic peptide AARKSAPATGGVK from human histone 3 was detected by nanoLC-MS/MS analysis. MS/MS spectrum of the doubly charged peptide ions at  $m/z$  [628.8510] $^{2+}$  with elution time at 32.55 min shows almost all y-ion series and b-ion series, demonstrating that R26 residue was converted to Citrulline (Arg > Cit) with increased 0.98402 Da. Meanwhile, K27 was identified as being acetylated (42.01057 Da). The MS/MS spectrum was searched against human database by using Proteome Discoverer 1.2 software with integrated SEQUEST searching engine with XCorr:3.75, and Probability:51.10. (C) ChIP analysis showing that H3Cit26 enrichment on TFF1 promoter is specifically competed by the H3Cit26 immunogen peptide. Anti-H3Cit26 antibody was mock- (PBS incubation) or preincubated with 1  $\mu$ g/mL H3Cit26 immunogen peptide (Abcam; ab20631), H3Cit2/8/17 immunogen peptide (Abcam; ab32876), or unmodified histone H3 (19–38) overnight at 4  $^{\circ}$ C. IgG was used as a control.

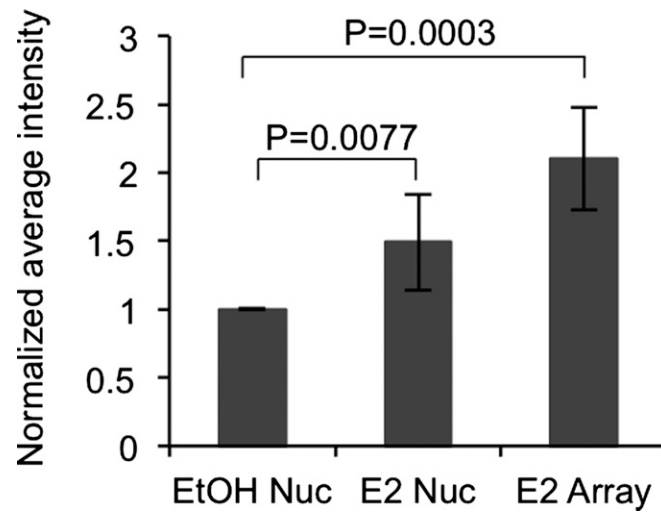

**Fig. S5.** Quantitation of H3Cit26 at the PRL-array. The histogram shows relative intensity for the anti-H3Cit26 signal in E2-treated nucleoplasm (E2 Nuc) and E2-treated array (E2 Array) compared with EtOH treated nucleoplasm (EtOH Nuc). *P* values were calculated based on the basis of two-tailed Student *t* test.



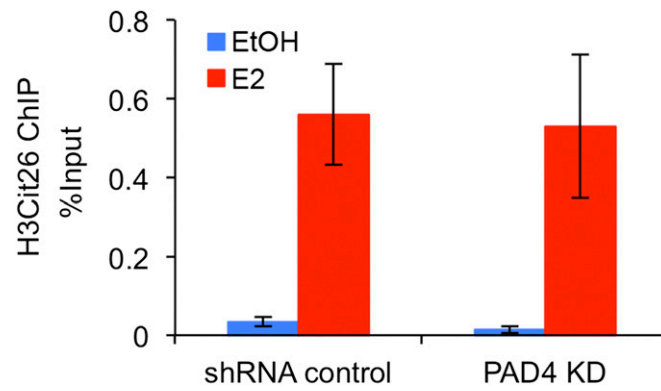

**Fig. 57.** Depletion of PAD4 does not inhibit H3Cit26 enrichment on *TFF1* ERE region. Depletion of PAD4 (PAD4 KD) from MCF-7 cells was described (3). E2 treatment induced the pronounced enrichment of H3Cit26 on the *TFF1* ERE region in the shRNA control MCF-7 cells, whereas this increase was not observed in the PAD4 depleted line.

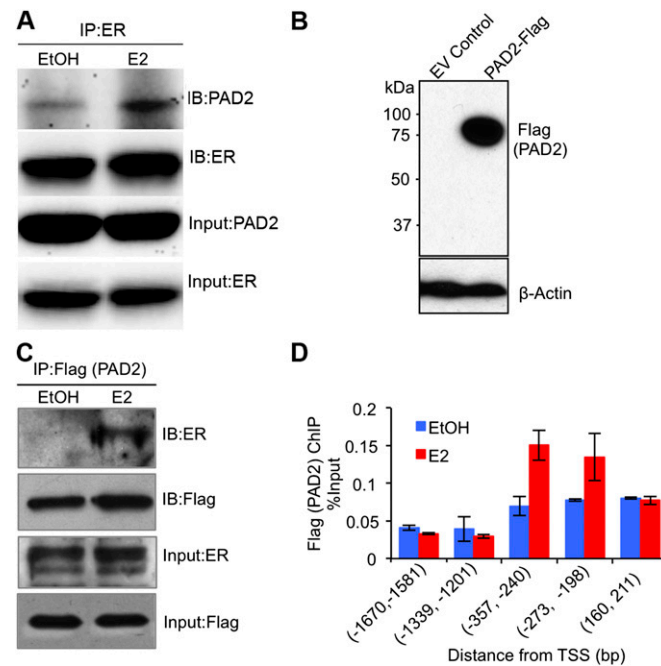

**Fig. 58.** E2 stimulates the association of PAD2 with ER at the ERE region on the *TFF1*. (A) Coimmunoprecipitation analysis in wild-type MCF-7 cells reveals that E2 treatment stimulates the interaction between endogenous PAD2 and ER. (B) Western blotting documenting PAD2 overexpression. EV represents the empty vector control.  $\beta$ -actin (Lower) revealed equal protein loading. (C) Coimmunoprecipitation analysis of MCF-7 cells stably overexpressing Flag-PAD2 reveals that E2 treatment stimulates the interaction between endogenous ER and ectopically expressed PAD2. (D) Ectogenic PAD2 is recruited to *TFF1* ERE promoter region after E2 treatment. ChIP assay with anti-Flag antibody on the *TFF1* tiling promoter regions in the MCF-7 cells stably overexpressing PAD2. E2 stimulation induced PAD2 recruitment to the ERE region.



**Table S1. Steady-state kinetic parameters for histone H3 and H4 substrates**

| Enzyme | Substrate  | $k_{cat}$ , $s^{-1}$   | $K_m$ , mM              | $k_{cat}/K_m$ , $s^{-1}\cdot M^{-1}$ |
|--------|------------|------------------------|-------------------------|--------------------------------------|
| PAD2   | H3         | ND*                    | ND*                     | 1,200                                |
|        | H3 (1–15)  | 2.4 + 0.10             | 1.9 + 0.25              | 1,250                                |
|        | H3 (22–30) | 1.4 + 0.17             | 3.7 + 1.0               | 370                                  |
|        | H4         | ND*                    | ND*                     | 2,400                                |
|        | H4 (1–15)  | 1.4 + 0.1              | 1.0 + 0.2               | 1,400                                |
| PAD4   | H3         | ND*                    | ND*                     | 3,700 <sup>†</sup>                   |
|        | H3 (1–15)  | 0.6 + 0.03             | 3.3 + 0.4               | 180                                  |
|        | H3 (22–30) | ND*                    | ND*                     | 60                                   |
|        | H4         | 1.2 + 0.2 <sup>‡</sup> | 0.1 + 0.03 <sup>‡</sup> | 9,000 <sup>‡</sup>                   |
|        | H4 (1–15)  | 2.5 + 0.1              | 0.6 + 0.1               | 4,400                                |

Kinetic parameters were measured by incubating the enzyme at 37 °C.  
\*ND, not determined due to a lack of saturation in the  $v$  versus  $[S]$  curves.  
<sup>†</sup>Value taken from ref. 1.  
<sup>‡</sup>Value taken from ref. 2.

- Slack JL, Causey CP, Luo Y, Thompson PR (2011) Development and use of clickable activity based protein profiling agents for protein arginine deiminase 4. *ACS Chem Biol* 6:466–476.
- Knuckley B, et al. (2010) Substrate specificity and kinetic studies of PADs 1, 3, and 4 identify potent and selective inhibitors of protein arginine deiminase 3. *Biochemistry* 49:4852–4863.

**Table S2. ERE matrix file found by MEME from the 208 E2-induced H3Cit26 binding sites**

| Position | "A"      | "C"      | "G "     | "T"      |
|----------|----------|----------|----------|----------|
| 1        | 0.048780 | 0.000000 | 0.658537 | 0.292683 |
| 2        | 0.000000 | 0.073171 | 0.926829 | 0.000000 |
| 3        | 0.000000 | 0.000000 | 0.000000 | 1.000000 |
| 4        | 0.000000 | 1.000000 | 0.000000 | 0.000000 |
| 5        | 1.000000 | 0.000000 | 0.000000 | 0.000000 |
| 6        | 0.073171 | 0.585366 | 0.341463 | 0.000000 |
| 7        | 0.414634 | 0.292683 | 0.121951 | 0.170732 |
| 8        | 0.000000 | 0.341463 | 0.487805 | 0.170732 |
| 9        | 0.146341 | 0.000000 | 0.000000 | 0.853659 |
| 10       | 0.073171 | 0.195122 | 0.682927 | 0.048780 |
| 11       | 0.243902 | 0.170732 | 0.292683 | 0.292683 |
| 12       | 0.170732 | 0.829268 | 0.000000 | 0.000000 |
| 13       | 0.000000 | 0.634146 | 0.000000 | 0.365854 |
| 14       | 0.097561 | 0.121951 | 0.097561 | 0.682927 |
| 15       | 0.024390 | 0.243902 | 0.243902 | 0.487805 |
